# Supplementary material for: Exploring interfacial dynamics in homodimeric S-ribosylhomocysteine lyase (LuxS) from Vibrio cholerae through molecular dynamics simulations
Source: Royal Society of Chemistry journal article supplement (doi:10.1039/d0ra08809a), 2021-01-01
Supplement: d0ra08809a1.pdf [file d0ra08809a1.pdf]

# Exploring Interfacial Dynamics in Homodimeric S-ribosylhomocysteine Lyases (LuxS) from *Vibrio Cholerae* Through Molecular Dynamics Simulation

Khair Bux<sup>1</sup>, Thomas S. Hofer<sup>\*2</sup>, and Syed Tarique Moin<sup>†1</sup>

<sup>1</sup>*H.E.J. Research Institute of Chemistry, International Center for Chemical and Biological Sciences, University of Karachi, Karachi-75270, Pakistan, E-Mail: tarique.syed@iccs.edu, Tel.: +92-21-99261774, Fax: +92-21-348-19018*

<sup>2</sup>*Theoretical Chemistry Division, Institute of General, Inorganic and Theoretical Chemistry, University of Innsbruck, Innrain 80-82, A-6020 Innsbruck, Austria, E-Mail: T.Hofer@uibk.ac.at, Tel.: +43-512-507-57102, Fax: +43-512-507-57199*

Dated: December 29, 2020

---

\*Corresponding author

†Corresponding author

*Simulation protocol:* All systems were subjected to enzyme minimization steps prior to equilibration to remove close-ranged intra- as well as inter-molecular interactions using the PMEMD module implemented in AMBER18 [1, 2]. To keep the coordination bond between the iron and inhibitors, distance restraints were applied throughout the simulation time from minimization to production MD. Initially 500 steps of minimization were carried out for the water molecules while applying restraints on the enzyme using a force constant of  $25 \text{ kcal.mol}^{-1}.\text{\AA}^{-1}$ . Afterwards, the force constant was gradually released after every 100 steps, thus a total of 1000 steps of restrained minimization were performed followed by an unrestrained minimization for 500 steps. After the minimization, the systems were subjected to heating and equilibration which involved thermal equilibration using the Langevin thermostat at 300 K. During the equilibration phase, pressure was maintained at  $\sim 1$  atm using a relaxation time of 1 ps in the pressure coupling algorithm [3]. Finally, simulations for productions were performed in the isothermal-isobaric (NPT) ensemble for a total of 200 ns for all the three systems with the sampling of the simulation trajectories performed every 2 ps using PMEMD module implemented with CUDA executed with the help of GPU based workstation. The first 100 ns MD simulation was considered as equilibration stage for all the systems and the final 100 ns simulation was for production MD. During the whole simulation time, bonds involving H-atoms were constrained employing the SHAKE algorithm [3] with a time interval of 2 fs, and the long-ranged electrostatic interactions were treated by the Particle Mesh Ewald (PME) algorithm [4] with the associated cutoff distance set to  $10 \text{ \AA}$ . In addition, for the case of complexes, the metal-ligand distance was attempted to keep restrained within range between  $1.9$  and  $2.0 \text{ \AA}$  as for the metal-water

coordination distance in the ligand-free enzyme along with certain parameters for the NMR restraint method, whereas the rest of the system was set free during the whole simulation time that is during equilibration as well as the production runs (overall simulation time). The simulation trajectories were analyzed with help of the cpptraj module implemented in AMBERTOOLS18 [5, 1], VMD [6] and Chimera [7] were employed for the visualization of the simulation data.

*Free energy simulation protocol:* MD simulations for the free energy calculation were carried out for both complexes of the LuxS enzyme with the RHC and KRI inhibitors following an appropriate protocol required for the simulation at each  $\lambda$  point. Prior to the simulations, minimization of the systems was carried out twice, first using the steepest descent algorithm, and second the L-BFGS algorithm for the minimization in order to avoid instabilities of the systems during ensemble averaging in the simulations. The systems were then equilibrated for 100 ps using a time-step of 2 fs using first the canonical and later the isothermal-isobaric ensembles. Finally, a  $\sim 1$  ns simulation was performed for each  $\lambda$ -value to collect data for the estimation of the free energy contribution. Again the particle Mesh Ewald (PME) algorithm was used for the treatment of non-bonded interactions using a cutoff distance of 12 Å for the Coulombic as well as the van der Waals interactions. A constant temperature was maintained at  $\sim 298$  K using the Langevin dynamics integrator with a coupling constant of 1.0 ps. The pressure was controlled using the Parinello-Rahman barostat fixed at 1 bar along with a coupling constant of 1.0 ps and a compressibility value for water set to  $4.5 \times 10^{-5} \text{ bar}^{-1}$  for all simulations. The trajectories obtained

from the AMBER simulation package [1, 10] were converted to GROMACS format for the estimation of the binding free energy through the thermodynamic integration (TI) method. GROMACS 2018.3 [11] was used for all free energy simulations performed after which the energy difference between the two states was estimated using the Bennett Acceptance Ratio (BAR) module of the GROMACS program enabling a straightforward data treatment [12]. The free energy estimates were determined using BAR with bisection, with the precision of the output set and an error estimate taking into account time correlations is made by splitting the data into blocks and determining the free energy differences over those blocks and assuming the blocks are independent. The final error estimate is determined from the average variance over 5 blocks. A range of block numbers for error estimation were also obtained. In general, the results are split in two parts: the last part contains the final results in kJ/mol, together with the error estimate for each part and the total. The first part contains detailed free energy difference estimates and phase space overlap measures in units of kT (together with their computed error estimate).

## References

- [1] Salomon-Ferrer, R.; Case, D. A.; Walker, R. C. *WIREs Comput. Mol. Sci.* **2013**, *3*(2), 198–210.
- [2] Salomon-Ferrer, R.; Gotz, A. W.; Poole, D.; Grand, S. L.; Walker, R. C. *J. Chem. Theory Comput.* **2013**, *9*(9), 3878–3888.

- [3] Ryckaert, J.; Ciccotti, G.; Berendsen, H. J. *J. Comput. Phys.* **1977**, *23*(3), 327.
- [4] Essmann, U.; Perera, L.; Berkowitz, M. L.; Darden, T.; Lee, H.; Pedersen, L. G. *J. Chem. Phys.* **1995**, *103*(19), 8577–8593.
- [5] Roe, D. R.; Cheatham III, T. E. *J. Chem. Theory Comput.* **2013**, *9*(7), 3084–3095.
- [6] Humphrey, W.; Dalke, A.; Schulten, K. *J. Mol. Graph.* **1996**, *14*(1), 33.
- [7] Pettersen, E. F.; Goddard, T. D.; Huang, C. C.; Couch, G. S.; Greenblatt, D. M.; Meng, E. C.; Ferrin, T. E. UCSF Chimera **2011**, *19*(18), 5507.
- [8] Villa, A.; Mark, A. E. *J. Comput. Chem.* **2002**, *23*(5), 548–553.
- [9] Shirts, M. R.; Pitner, J. W.; Swope, W. C.; Pande, V. S. *J. Chem. Phys.* **2003**, *119*(11), 5740–5761.
- [10] Case, D. A.; III, Cheatham III, T. E.; Darden, T.; Gohlke, H.; Luo, R.; Jr, K. M. M.; Onufriev, A.; Simmerling, C.; Wang, B.; Woods, R. J. *J. Comput. Chem.* **2005**, *26*(16), 1668–1688.
- [11] Abraham, M. J.; Murtola, T.; Schulz, R.; Páll, S.; Smith, J. C.; Hess, B.; Lindahl, E. *SoftwareX* **2015**, *1*, 19–25.
- [12] Bennett, C. H. *J. Comput. Phys.* **1976**, *22*(2), 245–268.

Figure S1: Ramachandran plot for the modelled LuxS enzyme obtained from PROCHECK Program

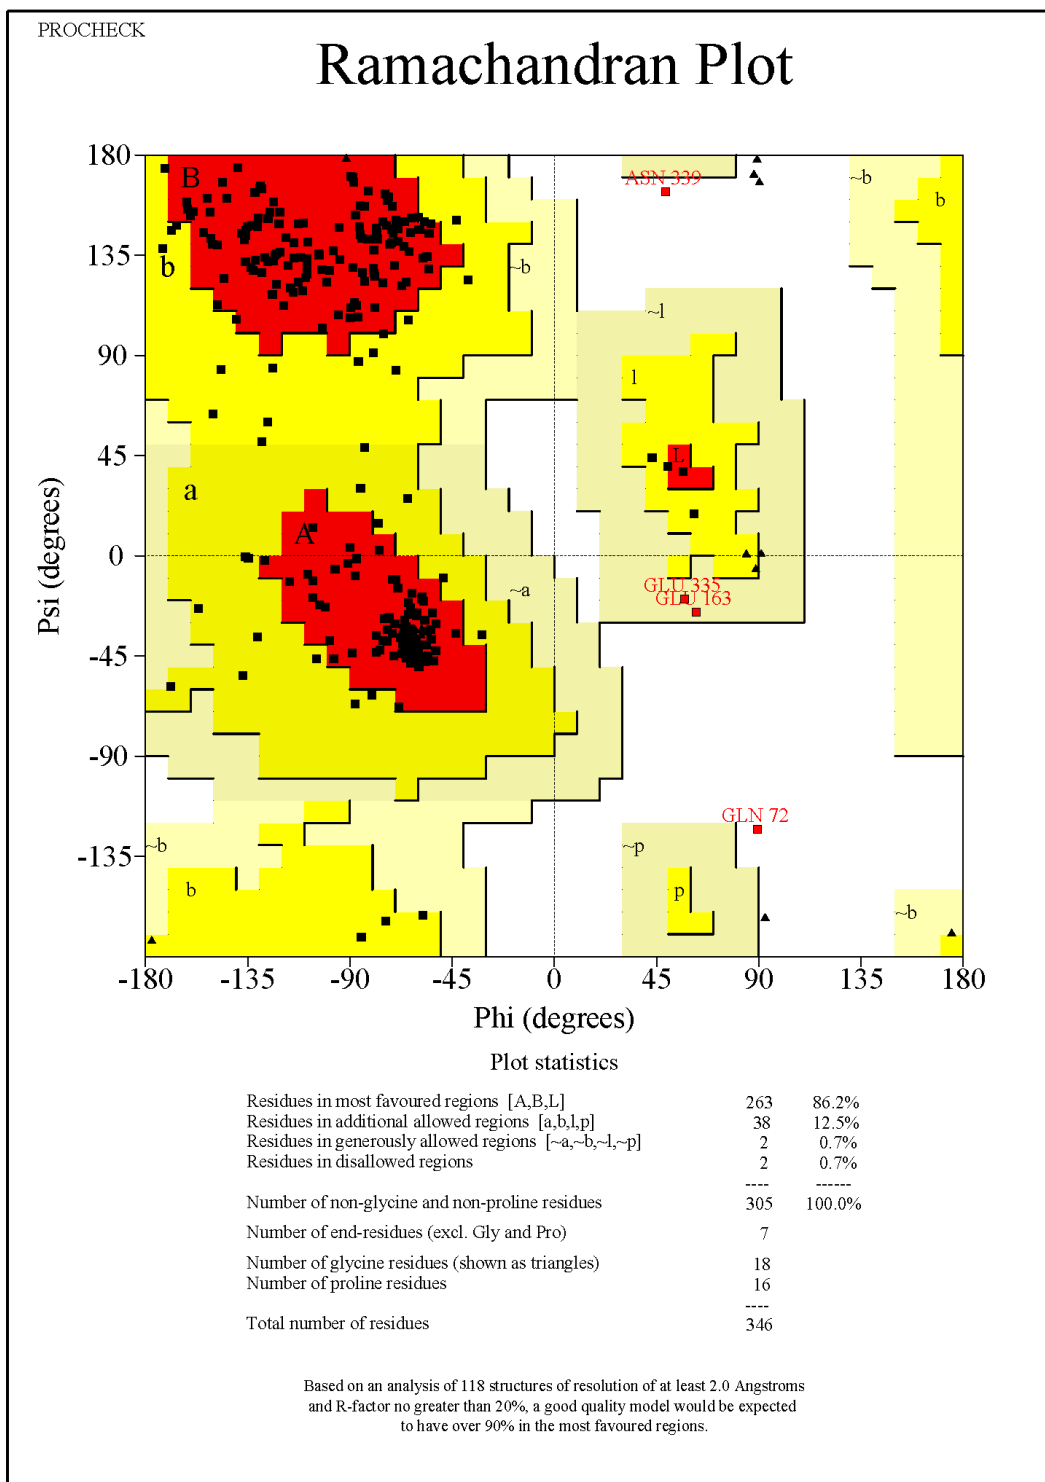

# Ligand parameter files obtained from GAFF

## RHC inhibitor

---

### prepin file

0 0 2

This is a remark line

molecule.res

MOL XYZ 0

CHANGE OMIT DU BEG

0.0000

|    |      |    |   |           |           |          |           |
|----|------|----|---|-----------|-----------|----------|-----------|
| 1  | DUMM | DU | M | 999.000   | 999.0     | -999.0   | .00000    |
| 2  | DUMM | DU | M | 999.000   | -999.0    | 999.0    | .00000    |
| 3  | DUMM | DU | M | -999.000  | 999.0     | 999.0    | .00000    |
| 4  | O1   | o  | M | 3.261000  | -7.261000 | 4.097000 | -0.719564 |
| 5  | C1   | c  | M | 2.196000  | -7.328000 | 3.419000 | 0.668787  |
| 6  | O2   | o  | E | 1.932000  | -8.041000 | 2.413000 | -0.719564 |
| 7  | C2   | c3 | M | 1.079000  | -6.384000 | 3.894000 | 0.211496  |
| 8  | N1   | n4 | 3 | 1.039000  | -5.089000 | 3.121000 | -0.577087 |
| 9  | H1   | hn | E | 0.779000  | -5.285000 | 2.145000 | 0.364494  |
| 10 | H2   | hn | E | 0.310000  | -4.469000 | 3.503000 | 0.364494  |
| 11 | H17  | hn | E | 1.926000  | -4.632000 | 3.189000 | 0.364494  |
| 12 | H3   | hx | E | 1.262000  | -6.093000 | 4.936000 | 0.022014  |
| 13 | C3   | c3 | M | -0.326000 | -6.993000 | 3.778000 | -0.163932 |
| 14 | H4   | hc | E | -0.542000 | -7.269000 | 2.737000 | 0.064226  |
| 15 | H5   | hc | E | -1.057000 | -6.219000 | 4.044000 | 0.064226  |
| 16 | C4   | c3 | M | -0.502000 | -8.223000 | 4.671000 | 0.094729  |
| 17 | H6   | h1 | E | 0.001000  | -9.088000 | 4.228000 | 0.082610  |
| 18 | H7   | h1 | E | -0.072000 | -8.067000 | 5.667000 | 0.082610  |

|    |     |    |   |           |           |          |           |
|----|-----|----|---|-----------|-----------|----------|-----------|
| 19 | S1  | ss | M | -2.268000 | -8.637000 | 4.850000 | -0.241420 |
| 20 | C5  | c3 | M | -2.718000 | -7.395000 | 6.113000 | -0.526807 |
| 21 | H8  | h1 | E | -2.503000 | -7.832000 | 7.094000 | 0.160840  |
| 22 | H9  | h1 | E | -2.080000 | -6.519000 | 5.986000 | 0.160840  |
| 23 | C6  | c3 | M | -4.200000 | -7.002000 | 6.006000 | 0.591398  |
| 24 | O3  | oh | S | -4.985000 | -8.078000 | 6.502000 | -0.620803 |
| 25 | H10 | ho | E | -4.802000 | -8.169000 | 7.453000 | 0.415802  |
| 26 | H11 | h1 | E | -4.460000 | -6.847000 | 4.952000 | 0.102413  |
| 27 | C7  | c3 | M | -4.480000 | -5.702000 | 6.787000 | -0.004201 |
| 28 | O4  | oh | S | -3.671000 | -4.677000 | 6.188000 | -0.660131 |
| 29 | H12 | ho | E | -3.710000 | -3.896000 | 6.765000 | 0.425536  |
| 30 | H13 | h1 | E | -4.136000 | -5.813000 | 7.824000 | 0.042683  |
| 31 | C8  | c3 | M | -5.930000 | -5.177000 | 6.792000 | 0.405812  |
| 32 | O5  | oh | S | -6.538000 | -5.376000 | 5.521000 | -0.734700 |
| 33 | H14 | ho | E | -7.421000 | -4.970000 | 5.552000 | 0.466893  |
| 34 | H15 | h1 | E | -5.895000 | -4.091000 | 6.948000 | -0.021687 |
| 35 | C9  | c  | M | -6.816000 | -5.750000 | 7.893000 | 0.162232  |
| 36 | H16 | h4 | E | -6.320000 | -5.675000 | 8.864000 | 0.068791  |
| 37 | O6  | o  | M | -7.158000 | -7.107000 | 7.655000 | -0.397522 |

LOOP

IMPROPER

C2 O1 C1 O2

C8 H16 C9 O6

DONE

STOP



**frmod file**

Remark line goes here

**MASS**

|    |        |       |
|----|--------|-------|
| o  | 16.000 | 0.434 |
| c  | 12.010 | 0.616 |
| c3 | 12.010 | 0.878 |
| n4 | 14.010 | 0.530 |
| hn | 1.008  | 0.161 |
| hx | 1.008  | 0.135 |
| hc | 1.008  | 0.135 |
| h1 | 1.008  | 0.135 |
| ss | 32.060 | 2.900 |
| oh | 16.000 | 0.465 |
| ho | 1.008  | 0.135 |
| h4 | 1.008  | 0.135 |

**BOND**

|       |        |       |
|-------|--------|-------|
| c-o   | 637.70 | 1.218 |
| c-c3  | 313.00 | 1.524 |
| c3-n4 | 283.30 | 1.511 |
| c3-hx | 338.70 | 1.091 |
| c3-c3 | 300.90 | 1.538 |
| hn-n4 | 373.20 | 1.030 |
| c3-hc | 330.60 | 1.097 |
| c3-h1 | 330.60 | 1.097 |
| c3-ss | 215.90 | 1.839 |
| c3-oh | 316.70 | 1.423 |
| ho-oh | 371.40 | 0.973 |
| c-h4  | 310.70 | 1.112 |

## ANGLE

|          |        |         |
|----------|--------|---------|
| o -c -o  | 77.900 | 130.250 |
| c3-c -o  | 67.400 | 123.200 |
| c -c3-n4 | 65.500 | 110.730 |
| c -c3-hx | 46.900 | 108.850 |
| c -c3-c3 | 63.300 | 111.040 |
| c3-n4-hn | 45.900 | 110.110 |
| c3-c3-hc | 46.300 | 109.800 |
| c3-c3-c3 | 62.900 | 111.510 |
| hx-c3-n4 | 48.600 | 108.010 |
| c3-c3-n4 | 64.200 | 114.210 |
| hn-n4-hn | 40.600 | 108.300 |
| c3-c3-hx | 46.200 | 110.560 |
| c3-c3-h1 | 46.400 | 109.560 |
| c3-c3-ss | 61.300 | 110.270 |
| hc-c3-hc | 39.400 | 107.580 |
| c3-ss-c3 | 60.200 | 99.240  |
| h1-c3-h1 | 39.200 | 108.460 |
| h1-c3-ss | 42.100 | 108.760 |
| c3-c3-oh | 67.500 | 110.190 |
| c3-oh-ho | 47.400 | 107.260 |
| h1-c3-oh | 50.900 | 110.260 |
| c3-c -h4 | 45.600 | 114.640 |
| c -c3-oh | 68.300 | 108.790 |
| c -c3-h1 | 47.000 | 108.220 |
| h4-c -o  | 54.200 | 120.700 |

## DIHE

|             |   |       |         |       |
|-------------|---|-------|---------|-------|
| o -c -c3-n4 | 6 | 0.000 | 180.000 | 2.000 |
| o -c -c3-hx | 6 | 0.000 | 180.000 | 2.000 |

|             |   |       |         |        |
|-------------|---|-------|---------|--------|
| o-c-c3-c3   | 6 | 0.000 | 180.000 | 2.000  |
| c-c3-n4-hn  | 9 | 1.400 | 0.000   | 3.000  |
| c-c3-c3-hc  | 9 | 1.400 | 0.000   | 3.000  |
| c-c3-c3-c3  | 9 | 1.400 | 0.000   | 3.000  |
| c3-c3-c3-h1 | 9 | 1.400 | 0.000   | 3.000  |
| c3-c3-c3-ss | 9 | 1.400 | 0.000   | 3.000  |
| hc-c3-c3-n4 | 9 | 1.400 | 0.000   | 3.000  |
| c3-c3-c3-n4 | 9 | 1.400 | 0.000   | 3.000  |
| hx-c3-n4-hn | 9 | 1.400 | 0.000   | 3.000  |
| c3-c3-n4-hn | 9 | 1.400 | 0.000   | 3.000  |
| hc-c3-c3-hx | 9 | 1.400 | 0.000   | 3.000  |
| c3-c3-c3-hx | 9 | 1.400 | 0.000   | 3.000  |
| c3-c3-ss-c3 | 3 | 1.000 | 0.000   | 3.000  |
| h1-c3-c3-hc | 9 | 1.400 | 0.000   | 3.000  |
| hc-c3-c3-ss | 9 | 1.400 | 0.000   | 3.000  |
| h1-c3-ss-c3 | 3 | 1.000 | 0.000   | 3.000  |
| oh-c3-c3-ss | 9 | 1.400 | 0.000   | 3.000  |
| h1-c3-c3-ss | 9 | 1.400 | 0.000   | 3.000  |
| c3-c3-oh-ho | 1 | 0.160 | 0.000   | -3.000 |
| c3-c3-oh-ho | 1 | 0.250 | 0.000   | 1.000  |
| c3-c3-c3-oh | 9 | 1.400 | 0.000   | 3.000  |
| c3-c3-c3-c3 | 1 | 0.180 | 0.000   | -3.000 |
| c3-c3-c3-c3 | 1 | 0.250 | 180.000 | -2.000 |
| c3-c3-c3-c3 | 1 | 0.200 | 180.000 | 1.000  |
| h1-c3-c3-oh | 1 | 0.000 | 0.000   | -3.000 |
| h1-c3-c3-oh | 1 | 0.250 | 0.000   | 1.000  |
| h1-c3-c3-h1 | 9 | 1.400 | 0.000   | 3.000  |
| oh-c3-c3-oh | 1 | 0.144 | 0.000   | -3.000 |
| oh-c3-c3-oh | 1 | 1.175 | 0.000   | 2.000  |
| h1-c3-oh-ho | 3 | 0.500 | 0.000   | 3.000  |

|             |   |       |         |        |
|-------------|---|-------|---------|--------|
| h4-c -c3-c3 | 6 | 0.000 | 180.000 | 2.000  |
| c -c3-c3-oh | 9 | 1.400 | 0.000   | 3.000  |
| c -c3-c3-h1 | 9 | 1.400 | 0.000   | 3.000  |
| h4-c -c3-oh | 6 | 0.000 | 180.000 | 2.000  |
| o -c -c3-oh | 6 | 0.000 | 180.000 | 2.000  |
| c -c3-oh-ho | 3 | 0.500 | 0.000   | 3.000  |
| h4-c -c3-h1 | 6 | 0.000 | 180.000 | 2.000  |
| o -c -c3-h1 | 1 | 0.800 | 0.000   | -1.000 |
| o -c -c3-h1 | 1 | 0.000 | 0.000   | -2.000 |
| o -c -c3-h1 | 1 | 0.080 | 180.000 | 3.000  |

#### IMPROPER

|            |      |       |     |                                                                        |
|------------|------|-------|-----|------------------------------------------------------------------------|
| c3-o -c -o | 1.1  | 180.0 | 2.0 | Using general improper torsional angle X- o- c- o, penalty score= 3.0) |
| c3-h4-c -o | 10.5 | 180.0 | 2.0 | Using general improper torsional angle X- X- c- o, penalty score= 6.0) |

#### NONBON

|    |        |        |
|----|--------|--------|
| o  | 1.6612 | 0.2100 |
| c  | 1.9080 | 0.0860 |
| c3 | 1.9080 | 0.1094 |
| n4 | 1.8240 | 0.1700 |
| hn | 0.6000 | 0.0157 |
| hx | 1.1000 | 0.0157 |
| hc | 1.4870 | 0.0157 |
| h1 | 1.3870 | 0.0157 |
| ss | 2.0000 | 0.2500 |
| oh | 1.7210 | 0.2104 |
| ho | 0.0000 | 0.0000 |
| h4 | 1.4090 | 0.0150 |

## KRI inhibitor

---

### prepin file

0 0 2

This is a remark line

molecule.res

MOL XYZ 0

CHANGE OMIT DU BEG

0.0000

|    |      |    |   |           |           |           |           |
|----|------|----|---|-----------|-----------|-----------|-----------|
| 1  | DUMM | DU | M | 999.000   | 999.0     | -999.0    | .00000    |
| 2  | DUMM | DU | M | 999.000   | -999.0    | 999.0     | .00000    |
| 3  | DUMM | DU | M | -999.000  | 999.0     | 999.0     | .00000    |
| 4  | O1   | o  | M | 47.433000 | 36.726000 | 47.275000 | -0.741706 |
| 5  | C1   | c  | M | 46.526000 | 37.474000 | 47.573000 | 0.761110  |
| 6  | O2   | o  | E | 46.467000 | 38.658000 | 47.287000 | -0.741706 |
| 7  | C2   | c3 | M | 45.862000 | 37.164000 | 48.934000 | 0.325018  |
| 8  | N1   | n4 | 3 | 46.303000 | 38.209000 | 49.982000 | -0.790951 |
| 9  | H1   | hn | E | 47.321000 | 38.118000 | 50.127000 | 0.415689  |
| 10 | H2   | hn | E | 46.182000 | 39.132000 | 49.516000 | 0.415689  |
| 11 | H3   | hn | E | 45.798000 | 38.159000 | 50.871000 | 0.415689  |
| 12 | H4   | hx | E | 46.261000 | 36.191000 | 49.229000 | 0.007682  |
| 13 | C3   | c3 | M | 44.326000 | 37.048000 | 48.783000 | -0.311195 |
| 14 | H5   | hc | E | 44.103000 | 36.366000 | 47.950000 | 0.039805  |
| 15 | H6   | hc | E | 43.897000 | 38.020000 | 48.505000 | 0.039805  |
| 16 | C4   | c3 | M | 43.650000 | 36.498000 | 50.057000 | 0.594536  |
| 17 | H7   | h1 | E | 44.110000 | 35.536000 | 50.319000 | -0.125855 |
| 18 | H8   | h1 | E | 43.773000 | 37.185000 | 50.902000 | -0.125855 |
| 19 | S1   | ss | M | 41.858000 | 36.196000 | 49.763000 | -0.257505 |
| 20 | C5   | c3 | M | 41.117000 | 37.869000 | 50.028000 | -0.195765 |

|    |     |    |   |           |           |           |           |
|----|-----|----|---|-----------|-----------|-----------|-----------|
| 21 | H9  | h1 | E | 41.723000 | 38.624000 | 49.516000 | 0.139804  |
| 22 | H10 | h1 | E | 40.118000 | 37.876000 | 49.571000 | 0.139804  |
| 23 | C6  | c3 | M | 40.976000 | 38.217000 | 51.531000 | 0.403623  |
| 24 | O3  | oh | S | 40.031000 | 37.334000 | 52.141000 | -0.707418 |
| 25 | H11 | ho | E | 39.290000 | 37.869000 | 52.499000 | 0.440148  |
| 26 | H12 | h1 | E | 41.952000 | 38.059000 | 52.006000 | -0.064771 |
| 27 | C7  | c3 | M | 40.571000 | 39.699000 | 51.755000 | -0.001443 |
| 28 | O4  | oh | S | 39.456000 | 40.069000 | 50.917000 | -0.657221 |
| 29 | H13 | ho | E | 38.640000 | 40.021000 | 51.467000 | 0.445226  |
| 30 | H14 | h1 | E | 41.429000 | 40.332000 | 51.498000 | 0.094620  |
| 31 | C8  | c  | M | 40.229000 | 39.960000 | 53.232000 | 0.681652  |
| 32 | O5  | o  | E | 39.125000 | 39.679000 | 53.667000 | -0.578321 |
| 33 | N2  | n  | M | 41.262000 | 40.388000 | 54.049000 | -0.434031 |
| 34 | H15 | hn | E | 42.187000 | 40.580000 | 53.687000 | 0.347394  |
| 35 | O6  | oh | M | 41.031000 | 40.759000 | 55.402000 | -0.397052 |
| 36 | H16 | ho | E | 40.768000 | 39.922000 | 55.843000 | 0.423501  |

LOOP

IMPROPER

C2 O1 C1 O2

C7 N2 C8 O5

C8 H15 N2 O6

DONE

STOP

**frmod file**

Remark line goes here

**MASS**

|    |        |       |
|----|--------|-------|
| o  | 16.000 | 0.434 |
| c  | 12.010 | 0.616 |
| c3 | 12.010 | 0.878 |
| n4 | 14.010 | 0.530 |
| hn | 1.008  | 0.161 |
| hx | 1.008  | 0.135 |
| hc | 1.008  | 0.135 |
| h1 | 1.008  | 0.135 |
| ss | 32.060 | 2.900 |
| oh | 16.000 | 0.465 |
| ho | 1.008  | 0.135 |
| n  | 14.010 | 0.530 |

**BOND**

|       |        |       |
|-------|--------|-------|
| c-o   | 637.70 | 1.218 |
| c-c3  | 313.00 | 1.524 |
| c3-n4 | 283.30 | 1.511 |
| c3-hx | 338.70 | 1.091 |
| c3-c3 | 300.90 | 1.538 |
| hn-n4 | 373.20 | 1.030 |
| c3-hc | 330.60 | 1.097 |
| c3-h1 | 330.60 | 1.097 |
| c3-ss | 215.90 | 1.839 |
| c3-oh | 316.70 | 1.423 |
| ho-oh | 371.40 | 0.973 |
| c-n   | 427.60 | 1.379 |
| hn-n  | 403.20 | 1.013 |

n -oh 400.20 1.406

#### ANGLE

|          |        |         |
|----------|--------|---------|
| o -c -o  | 77.900 | 130.250 |
| c3-c -o  | 67.400 | 123.200 |
| c -c3-n4 | 65.500 | 110.730 |
| c -c3-hx | 46.900 | 108.850 |
| c -c3-c3 | 63.300 | 111.040 |
| c3-n4-hn | 45.900 | 110.110 |
| c3-c3-hc | 46.300 | 109.800 |
| c3-c3-c3 | 62.900 | 111.510 |
| hx-c3-n4 | 48.600 | 108.010 |
| c3-c3-n4 | 64.200 | 114.210 |
| hn-n4-hn | 40.600 | 108.300 |
| c3-c3-hx | 46.200 | 110.560 |
| c3-c3-h1 | 46.400 | 109.560 |
| c3-c3-ss | 61.300 | 110.270 |
| hc-c3-hc | 39.400 | 107.580 |
| c3-ss-c3 | 60.200 | 99.240  |
| h1-c3-h1 | 39.200 | 108.460 |
| h1-c3-ss | 42.100 | 108.760 |
| c3-c3-oh | 67.500 | 110.190 |
| c3-oh-ho | 47.400 | 107.260 |
| h1-c3-oh | 50.900 | 110.260 |
| c3-c -n  | 66.800 | 115.180 |
| c -c3-oh | 68.300 | 108.790 |
| c -c3-h1 | 47.000 | 108.220 |
| c -n -hn | 48.300 | 117.550 |
| c -n -oh | 68.200 | 115.510 |
| n -c -o  | 74.200 | 123.050 |



ho-oh-n 50.500 101.290

hn-n -oh 50.400 110.740

DIHE

o -c -c3-n4 6 0.000 180.000 2.000

o -c -c3-hx 6 0.000 180.000 2.000

o -c -c3-c3 6 0.000 180.000 2.000

c -c3-n4-hn 9 1.400 0.000 3.000

c -c3-c3-hc 9 1.400 0.000 3.000

c -c3-c3-c3 9 1.400 0.000 3.000

c3-c3-c3-h1 9 1.400 0.000 3.000

c3-c3-c3-ss 9 1.400 0.000 3.000

hc-c3-c3-n4 9 1.400 0.000 3.000

c3-c3-c3-n4 9 1.400 0.000 3.000

hx-c3-n4-hn 9 1.400 0.000 3.000

c3-c3-n4-hn 9 1.400 0.000 3.000

hc-c3-c3-hx 9 1.400 0.000 3.000

c3-c3-c3-hx 9 1.400 0.000 3.000

c3-c3-ss-c3 3 1.000 0.000 3.000

h1-c3-c3-hc 9 1.400 0.000 3.000

hc-c3-c3-ss 9 1.400 0.000 3.000

h1-c3-ss-c3 3 1.000 0.000 3.000

oh-c3-c3-ss 9 1.400 0.000 3.000

h1-c3-c3-ss 9 1.400 0.000 3.000

c3-c3-oh-ho 1 0.160 0.000 -3.000

c3-c3-oh-ho 1 0.250 0.000 1.000

c3-c3-c3-oh 9 1.400 0.000 3.000

h1-c3-c3-oh 1 0.000 0.000 -3.000

h1-c3-c3-oh 1 0.250 0.000 1.000

h1-c3-c3-h1 9 1.400 0.000 3.000

|             |   |        |         |        |
|-------------|---|--------|---------|--------|
| n -c -c3-c3 | 1 | 0.100  | 0.000   | -4.000 |
| n -c -c3-c3 | 1 | 0.070  | 0.000   | 2.000  |
| oh-c3-c3-oh | 1 | 0.144  | 0.000   | -3.000 |
| oh-c3-c3-oh | 1 | 1.175  | 0.000   | 2.000  |
| c -c3-c3-oh | 9 | 1.400  | 0.000   | 3.000  |
| h1-c3-oh-ho | 3 | 0.500  | 0.000   | 3.000  |
| c -c3-c3-h1 | 9 | 1.400  | 0.000   | 3.000  |
| c3-c -n -hn | 4 | 10.000 | 180.000 | 2.000  |
| c3-c -n -oh | 4 | 10.000 | 180.000 | 2.000  |
| o -c -c3-oh | 6 | 0.000  | 180.000 | 2.000  |
| n -c -c3-oh | 6 | 0.000  | 180.000 | 2.000  |
| c -c3-oh-ho | 3 | 0.500  | 0.000   | 3.000  |
| o -c -c3-h1 | 1 | 0.800  | 0.000   | -1.000 |
| o -c -c3-h1 | 1 | 0.000  | 0.000   | -2.000 |
| o -c -c3-h1 | 1 | 0.080  | 180.000 | 3.000  |
| n -c -c3-h1 | 6 | 0.000  | 180.000 | 2.000  |
| c -n -oh-ho | 2 | 3.000  | 0.000   | 2.000  |
| o -c -n -hn | 1 | 2.500  | 180.000 | -2.000 |
| o -c -n -hn | 1 | 2.000  | 0.000   | 1.000  |
| o -c -n -oh | 4 | 10.000 | 180.000 | 2.000  |
| hn-n -oh-ho | 2 | 3.000  | 0.000   | 2.000  |

#### IMPROPER

|             |      |       |     |                                                                        |
|-------------|------|-------|-----|------------------------------------------------------------------------|
| c3-o -c -o  | 1.1  | 180.0 | 2.0 | Using general improper torsional angle X- o- c- o, penalty score= 3.0) |
| c3-n -c -o  | 10.5 | 180.0 | 2.0 | Using general improper torsional angle X- X- c- o, penalty score= 6.0) |
| c -hn-n -oh | 1.1  | 180.0 | 2.0 | Using the default value                                                |

#### NONBON

|   |        |        |
|---|--------|--------|
| o | 1.6612 | 0.2100 |
|---|--------|--------|

|    |        |        |
|----|--------|--------|
| c  | 1.9080 | 0.0860 |
| c3 | 1.9080 | 0.1094 |
| n4 | 1.8240 | 0.1700 |
| hn | 0.6000 | 0.0157 |
| hx | 1.1000 | 0.0157 |
| hc | 1.4870 | 0.0157 |
| h1 | 1.3870 | 0.0157 |
| ss | 2.0000 | 0.2500 |
| oh | 1.7210 | 0.2104 |
| ho | 0.0000 | 0.0000 |
| n  | 1.8240 | 0.1700 |
